# Supplementary material for: Single-cell RNA-seq unravels alterations of the human spermatogonial stem cell compartment in patients with impaired spermatogenesis
Source: PubMed Central journal article supplement — Cell Rep Med. 2021 Sep 9;2(9):100395. doi: 10.1016/j.xcrm.2021.100395 (PMC8484693; doi:10.1016/j.xcrm.2021.100395), 2021-09-09
Supplement: mmc1.pdf [file mmc1.pdf]

**Cell Reports Medicine, Volume 2**

**Supplemental information**

**Single-cell RNA-seq unravels**

**alterations of the human spermatogonial stem cell**

**compartment in patients with impaired spermatogenesis**

**Sara Di Persio, Tobias Tekath, Lara Marie Siebert-Kuss, Jann-Frederik Cremers, Joachim Wistuba, Xiaolin Li, Gerd Meyer zu Hörste, Hannes C.A. Drexler, Margot Julia Wyrwoll, Frank Tüttelmann, Martin Dugas, Sabine Kliesch, Stefan Schlatt, Sandra Laurentino, and Nina Neuhaus**

## **SUPPLEMENTAL FIGURES**

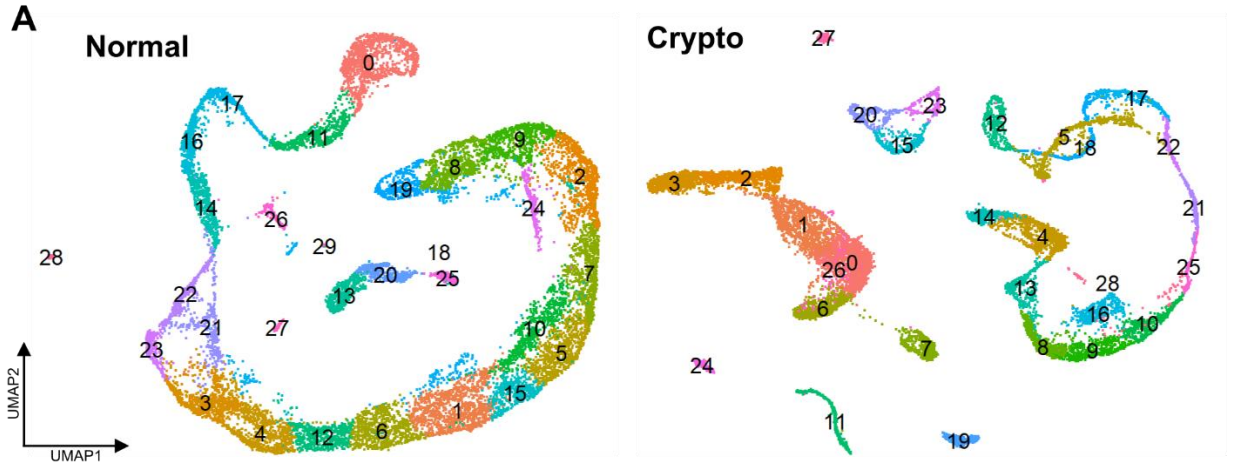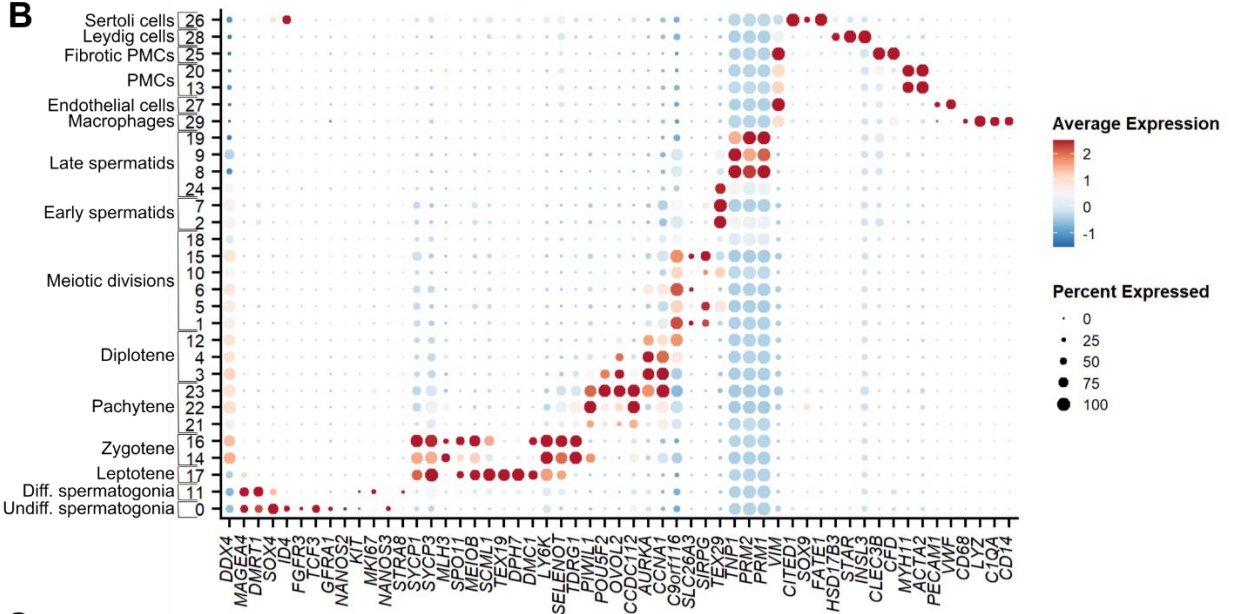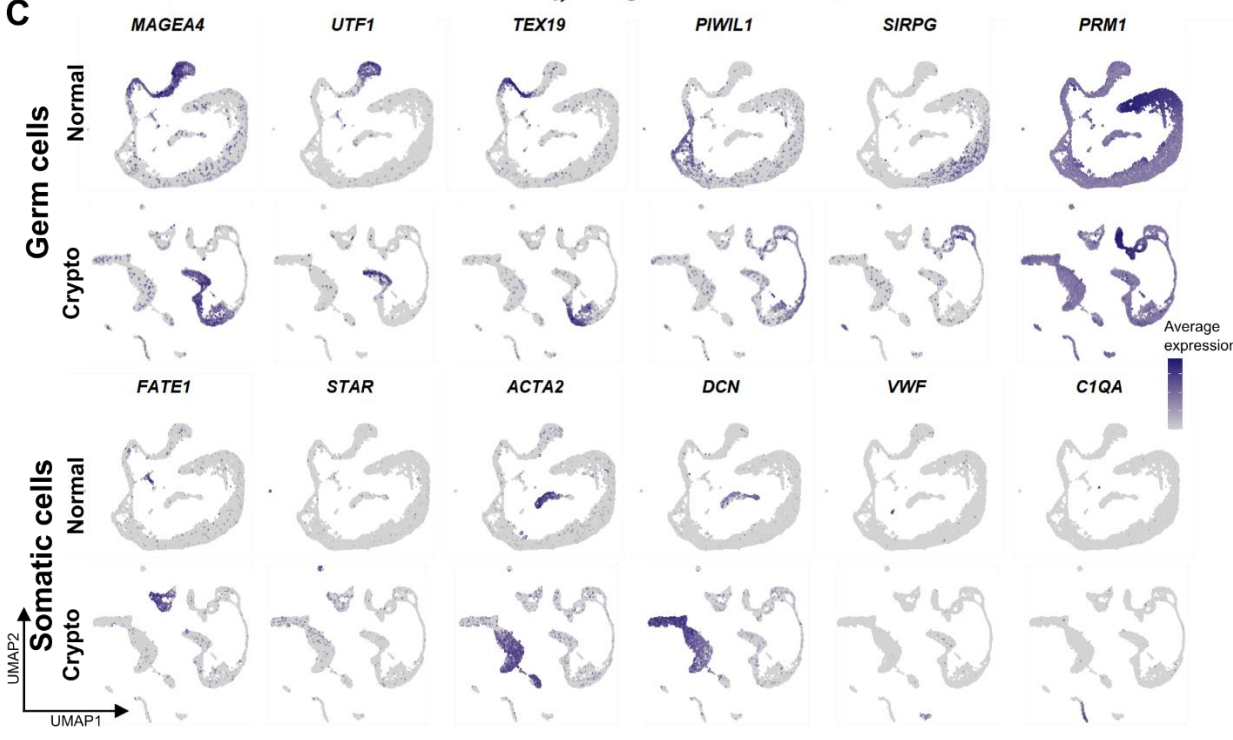

**Figure S1: Clustering analysis of normal and crypto datasets.** (Related to Figure 1)

(A) Uniform manifold approximation and projection (UMAP) plot of the clustering analysis of the integrated (left) normal (15 546 cells, 30 clusters) and (right) crypto (13 144 cells, 29 clusters) datasets.

(B) Dot plot showing the relative expression of 55 marker genes in the 30 normal clusters. Cell identity was assigned according to marker expression. The color and size of the dots represent the average expression and the percentage of cells expressing each marker in a cluster, as indicated in the key.

(C) Feature plots showing the expression of germ cell and somatic cell marker genes in the normal and crypto datasets.

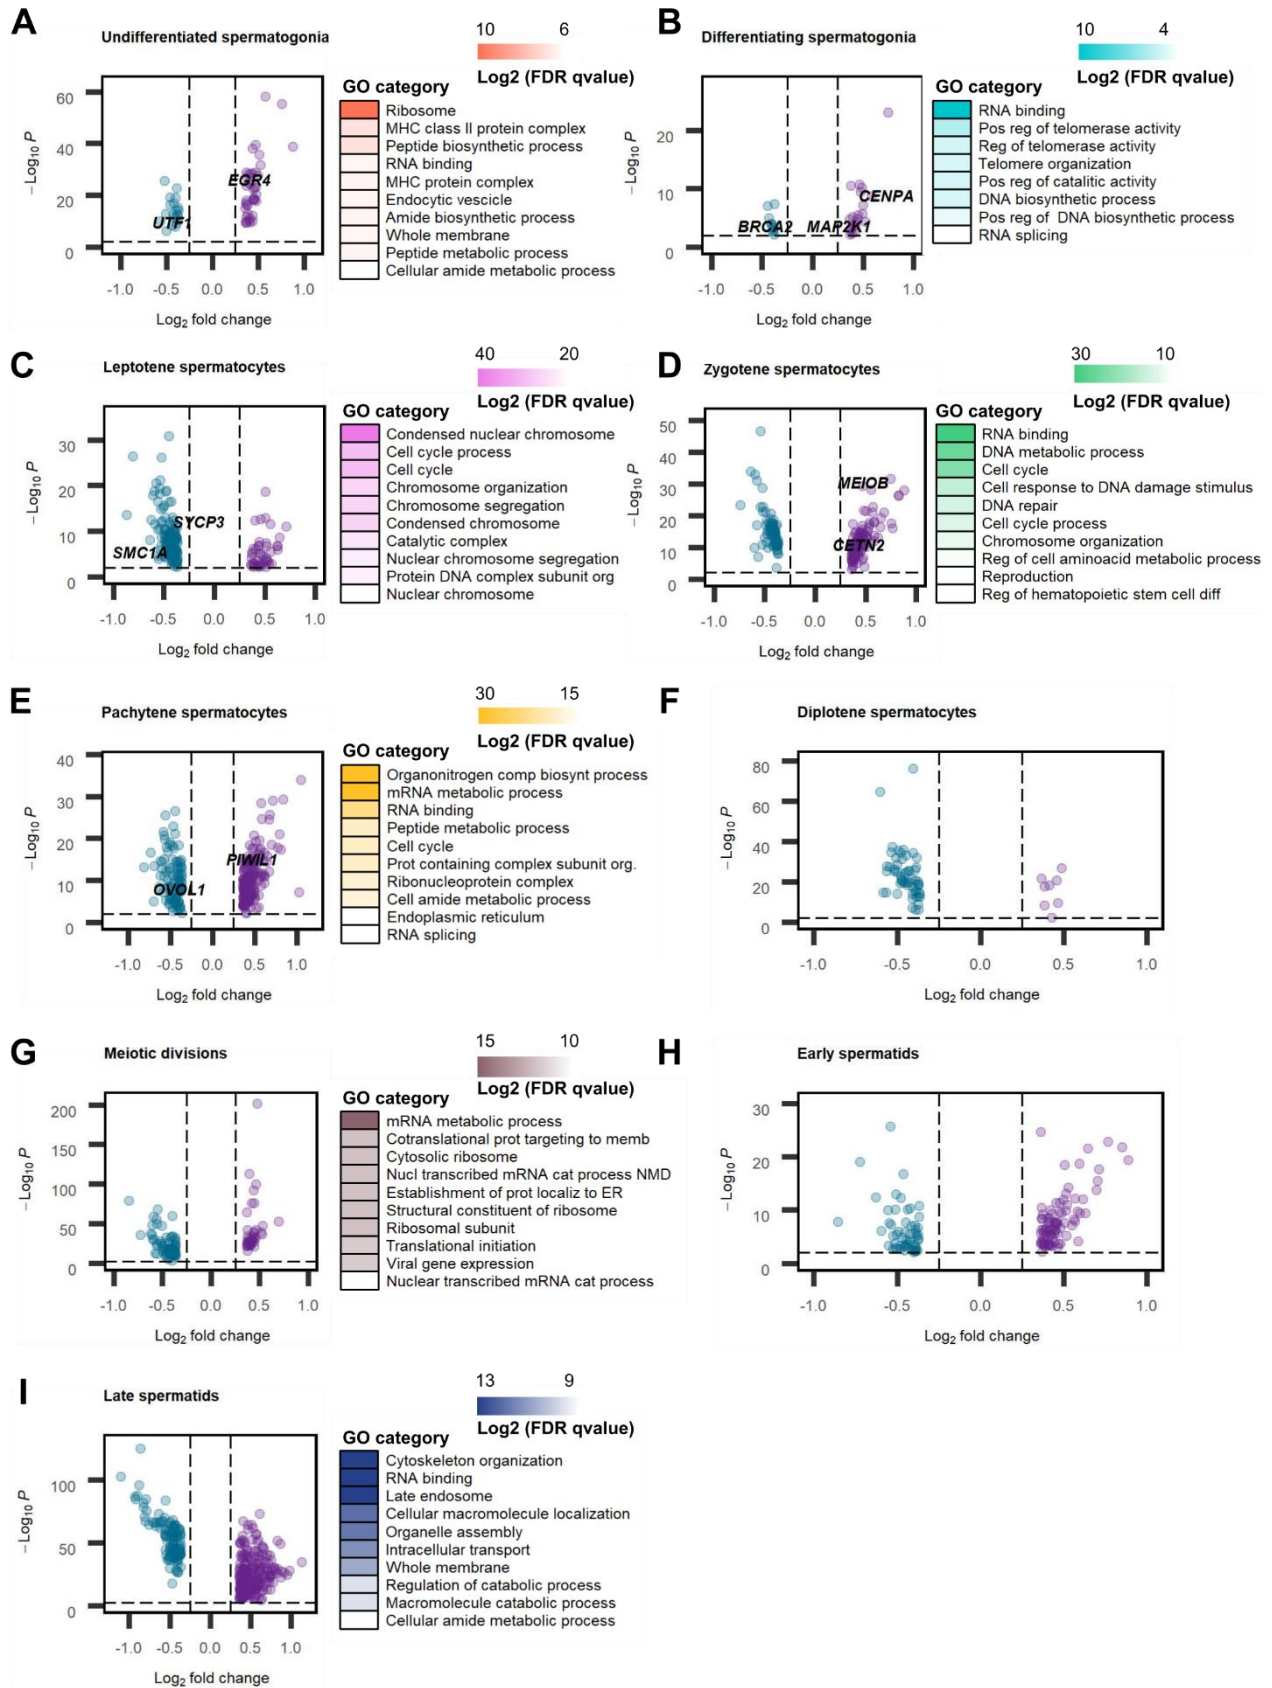

**Figure S2: DGE and GO analysis between the different germ cell clusters of the normal and crypto datasets.**

(Related to Figure 2)

(A) Volcano plot (Left) and gene ontology (GO) analysis (Right) of the 61 genes uniquely differentially expressed in the undifferentiated spermatogonial cluster.

(B) Volcano plot (Left) and GO analysis (Right) of the 32 genes uniquely differentially expressed in the differentiating spermatogonial cluster.

(C) Volcano plot (Left) and GO analysis (Right) of the 164 genes uniquely differentially expressed in the leptotene spermatocyte cluster.

(D) Volcano plot (Left) and GO analysis (Right) of the 180 genes uniquely differentially expressed in the zygotene spermatocyte cluster.

(E) Volcano plot (Left) and GO analysis (Right) of the 271 genes uniquely differentially expressed in the pachytene spermatocyte cluster.

(F) Volcano plot of the 66 genes uniquely differentially expressed in the diplotene spermatocyte cluster.

(G) Volcano plot (Left) and GO analysis (Right) of the 121 genes uniquely differentially expressed in the meiotic division cluster.

(H) Volcano plot of the 142 genes uniquely differentially expressed in the early spermatid cluster.

(I) Volcano plot (Left) and GO analysis (Right) of the 405 genes uniquely differentially expressed in the late spermatid cluster. See Table S4 for the statistical details.

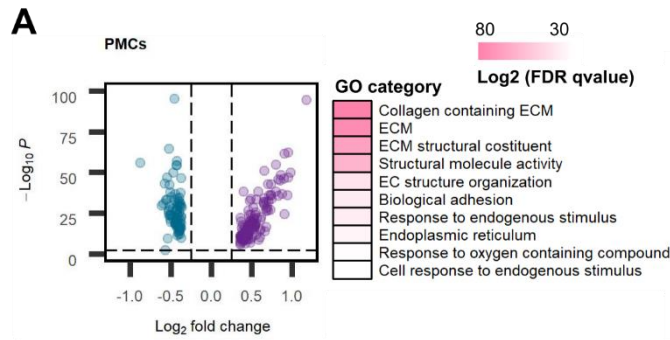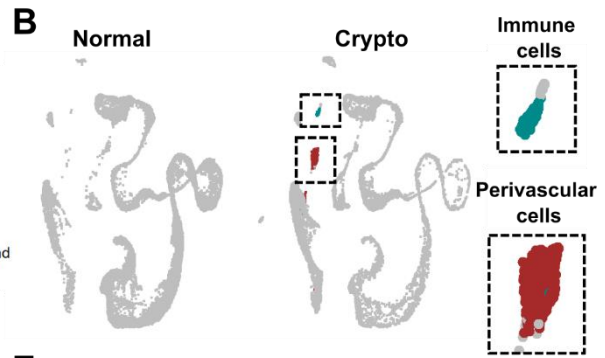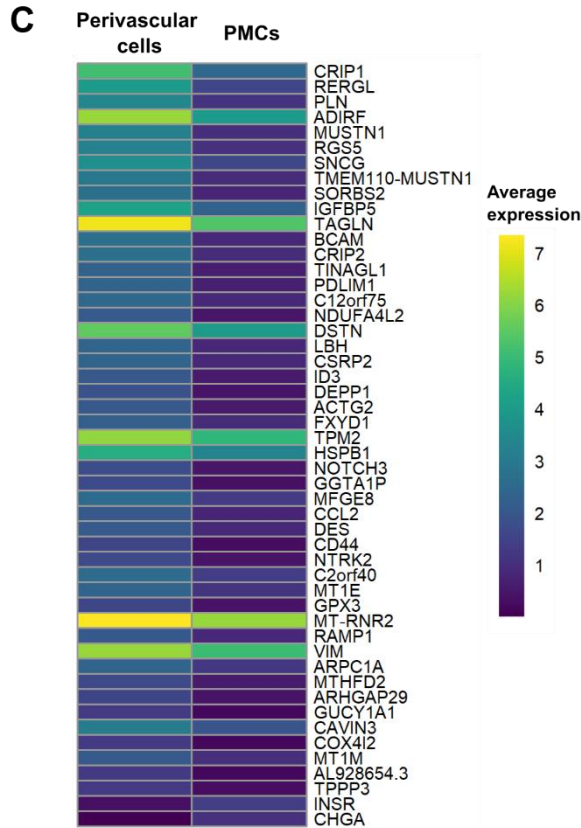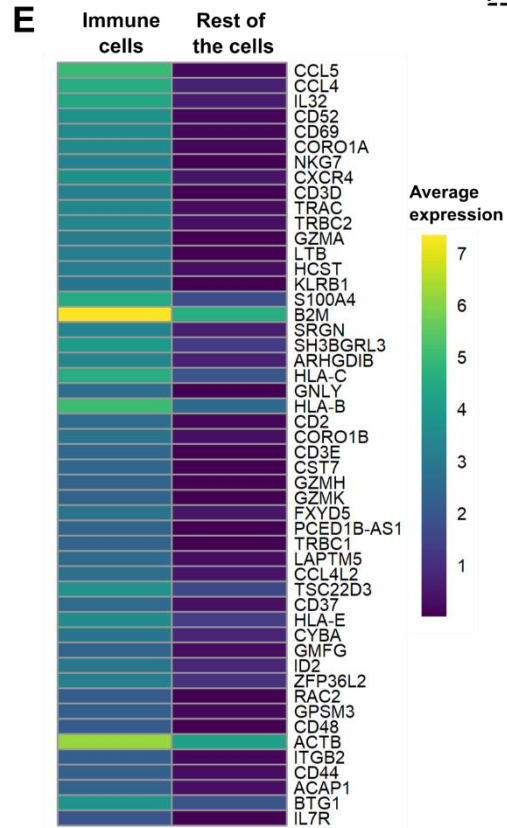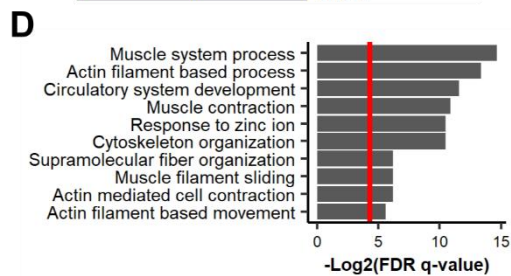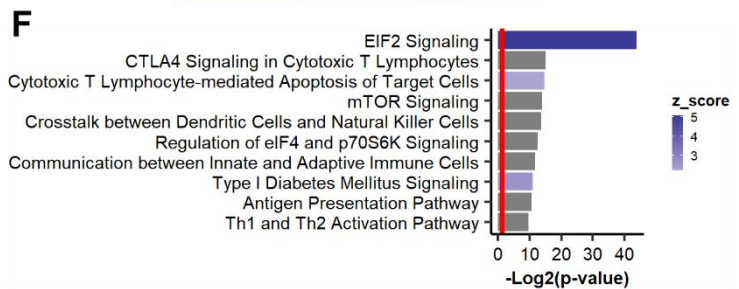

**Figure S3: DGE and GO analysis between the different somatic cell clusters of the normal and crypto datasets.** (Related to Figure 2)

(A) Volcano plot (Left) and GO analysis (Right) of the 232 genes uniquely differentially expressed in the PMC cluster. See Supplementary information, Table S4 for the statistical details.

(B) UMAP plot of the normal (Left) and crypto (Right) datasets showing the unique presence of the peritubular (Red) and immune (Green) cell clusters in the crypto dataset.

(C) Heatmap showing the differential gene expression analysis between the perivascular cell clusters and the PMCs in the crypto dataset. The analysis identified 48 differentially expressed genes (DEG), including *MUSTN1*, with a higher expression in perivascular cells (Table S5).

(D) The bar plot shows the GO analysis of the 48 DEG found in perivascular cells. The results were enriched in GO terms related to muscle and cytoskeletal contraction. The red line on the bar plot represent  $p=0.05$ .

(E) Heatmap showing the first 50 genes of the differential gene expression analysis between immune cells and the rest of the cells in the crypto dataset. A total of 195 genes showed higher expression in cluster 24 (A complete list of the DEG is available Table S5).

(F) The bar plot shows the pathway analysis of the 195 DEG. The results were enriched in immune cell associated pathways. The red line on the bar plot represents the  $p=0.05$ . The  $z\_score$  represents the activation level of each pathway.



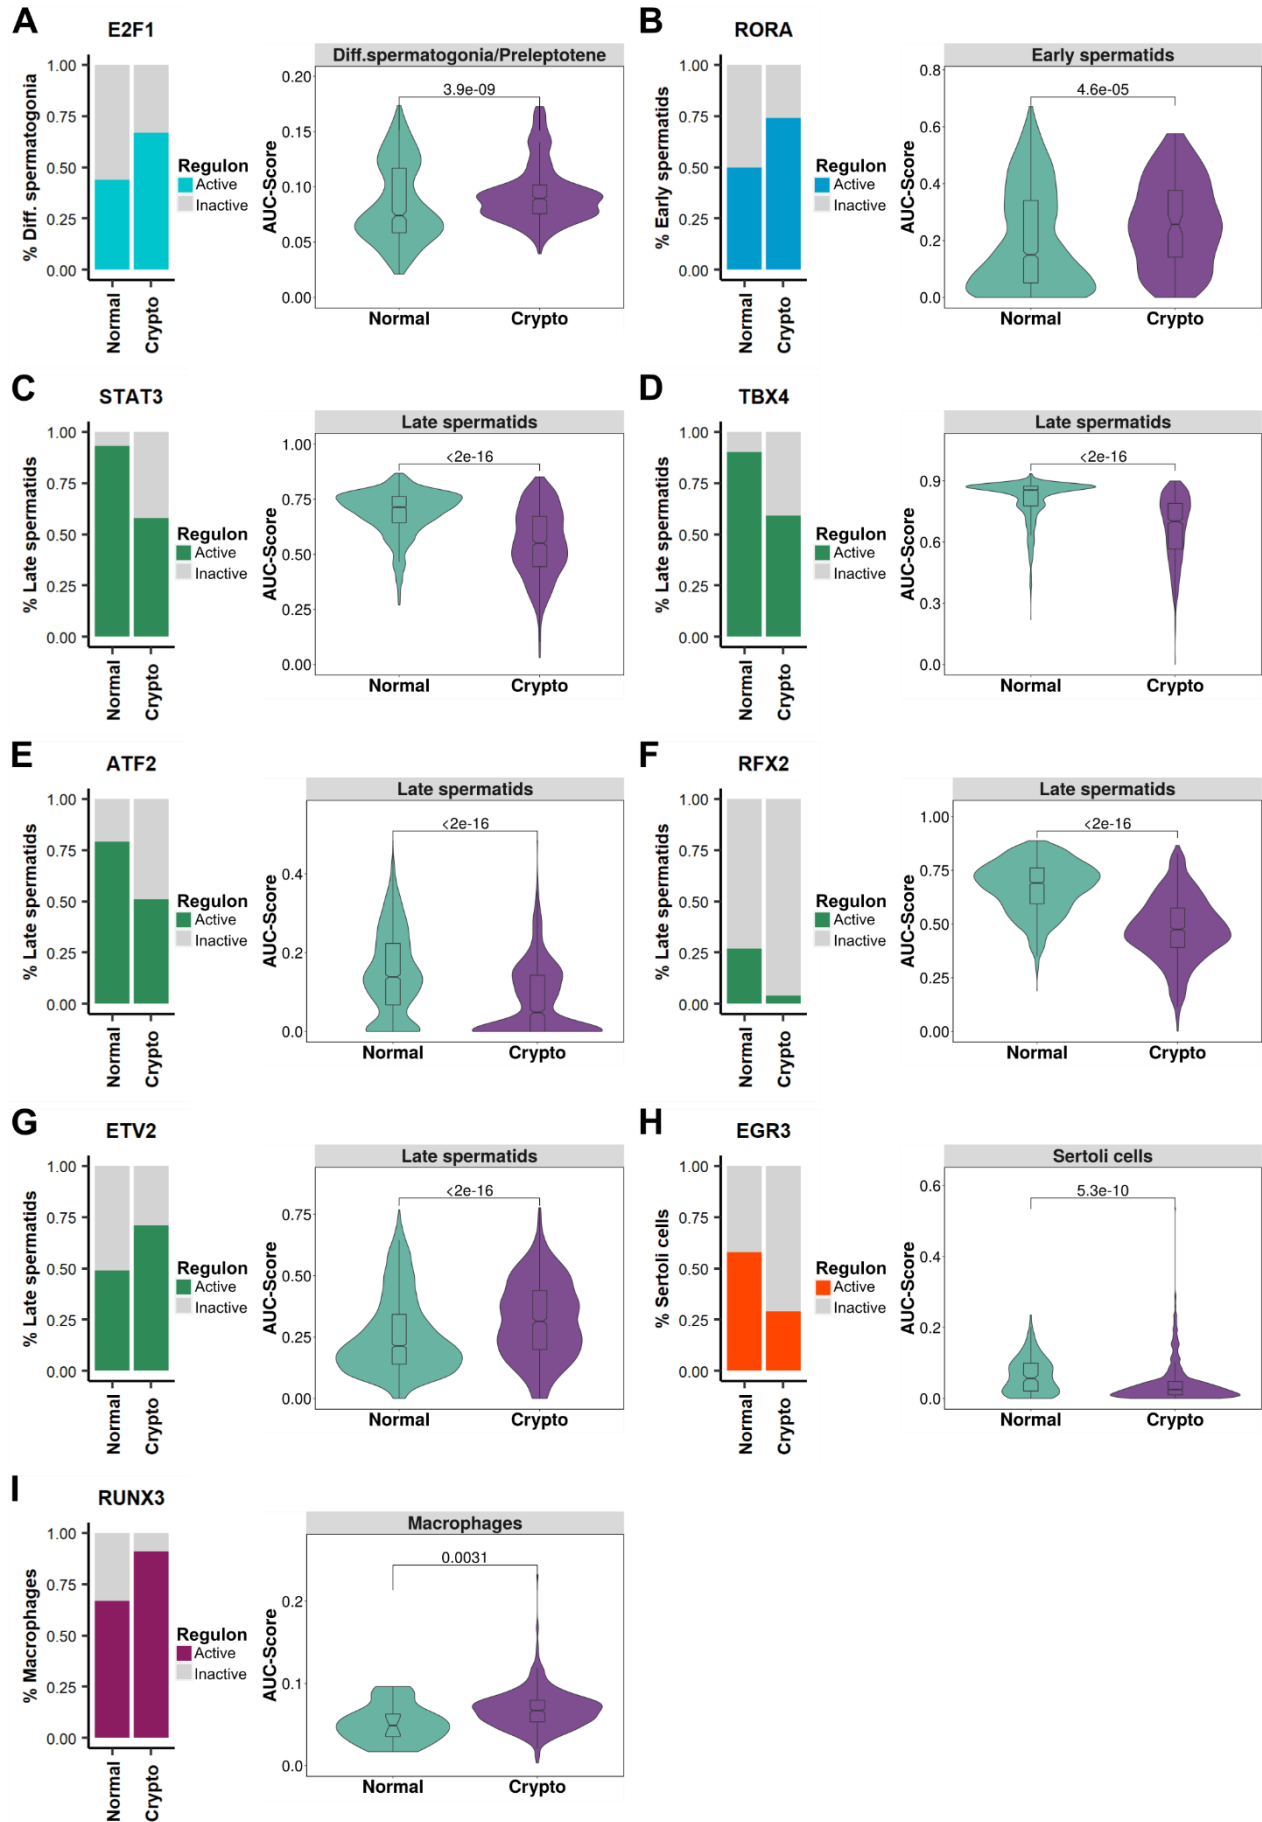

**Figure S4: Differential regulon activation in the normal and crypto datasets.** (Related to Figure 4)

(A-I) Left panel: Stacked bar plot comparing the proportion of cells with active regulons. Right panel: Violin plots comparing the AUC score of the regulons in the normal and crypto dataset. The regulons are organized as follow: (A) E2F1 in the differentiating spermatogonia/preleptotene, (B) RORA in the early spermatids, (C) STAT3, (D) TBX4, (E) ATF2, (F) RFX2 and (G) ETV2 in the late spermatids, (H) EGR3 in the Sertoli cells and (I) RUNX3 in the macrophages. A significant change was found for all the nine regulons in the crypto dataset.

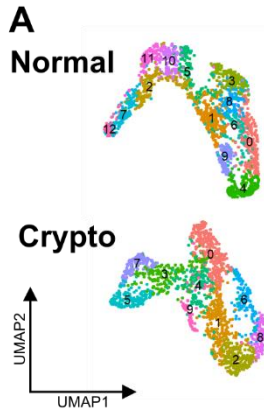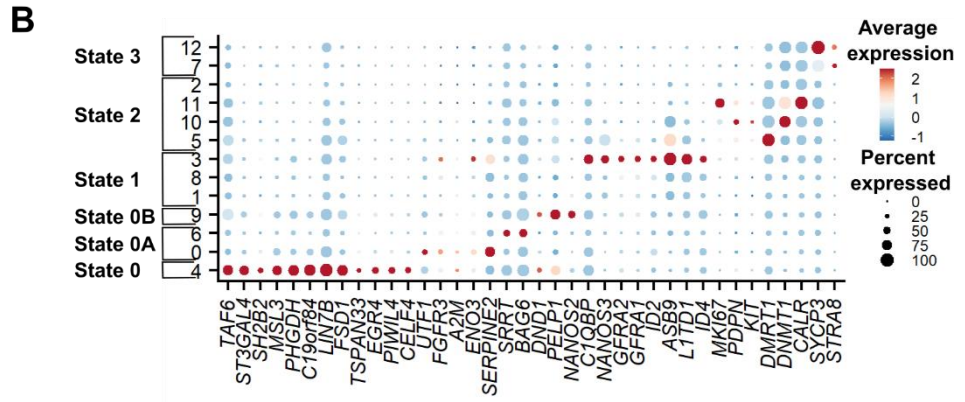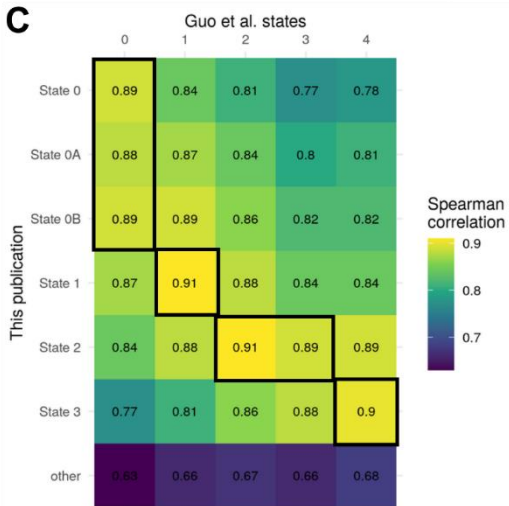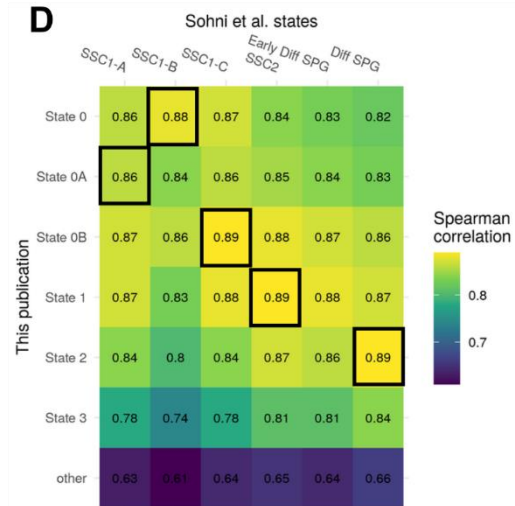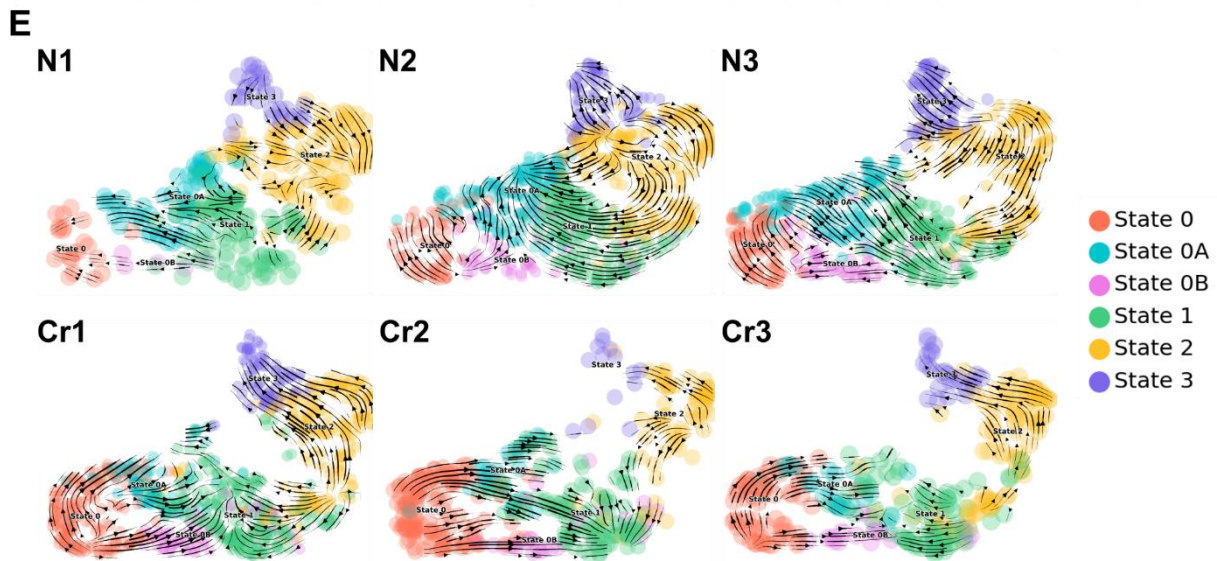

**Figure S5: Cluster analysis and assignment of normal and crypto spermatogonial datasets.** (Related to Figure 5)

**(A)** UMAP plot of the integrated normal (upper panel, 13 clusters) and crypto (lower panel, 10 clusters) spermatogonial datasets. The cells are color coded according to the cluster.

**(B)** Dot plot showing the relative expression of selected marker genes in the 13 normal clusters. The color and size of the dots represent the average expression and the percentage of cells expressing each marker in a cluster, as indicated in the key. According to the marker expression, six clusters were defined: State 0, 0A, 0B, 1, 2, and 3.

**(C-D)** Correlation analysis comparing the transcriptome of the different spermatogonial states defined in this publication with those defined in Guo et al., 2018 **(C)** and Sohni et al., 2019 **(D)**. The ‘other’ state is comprised of all non-spermatogonial cell types available in this publication. The black boxes show the states where we expected the highest correlation in each state.

**(E)** Contribution of each normal and crypto sample to the RNA velocity derived from the scVelo dynamical model visualized as streamlines in UMAP plots.

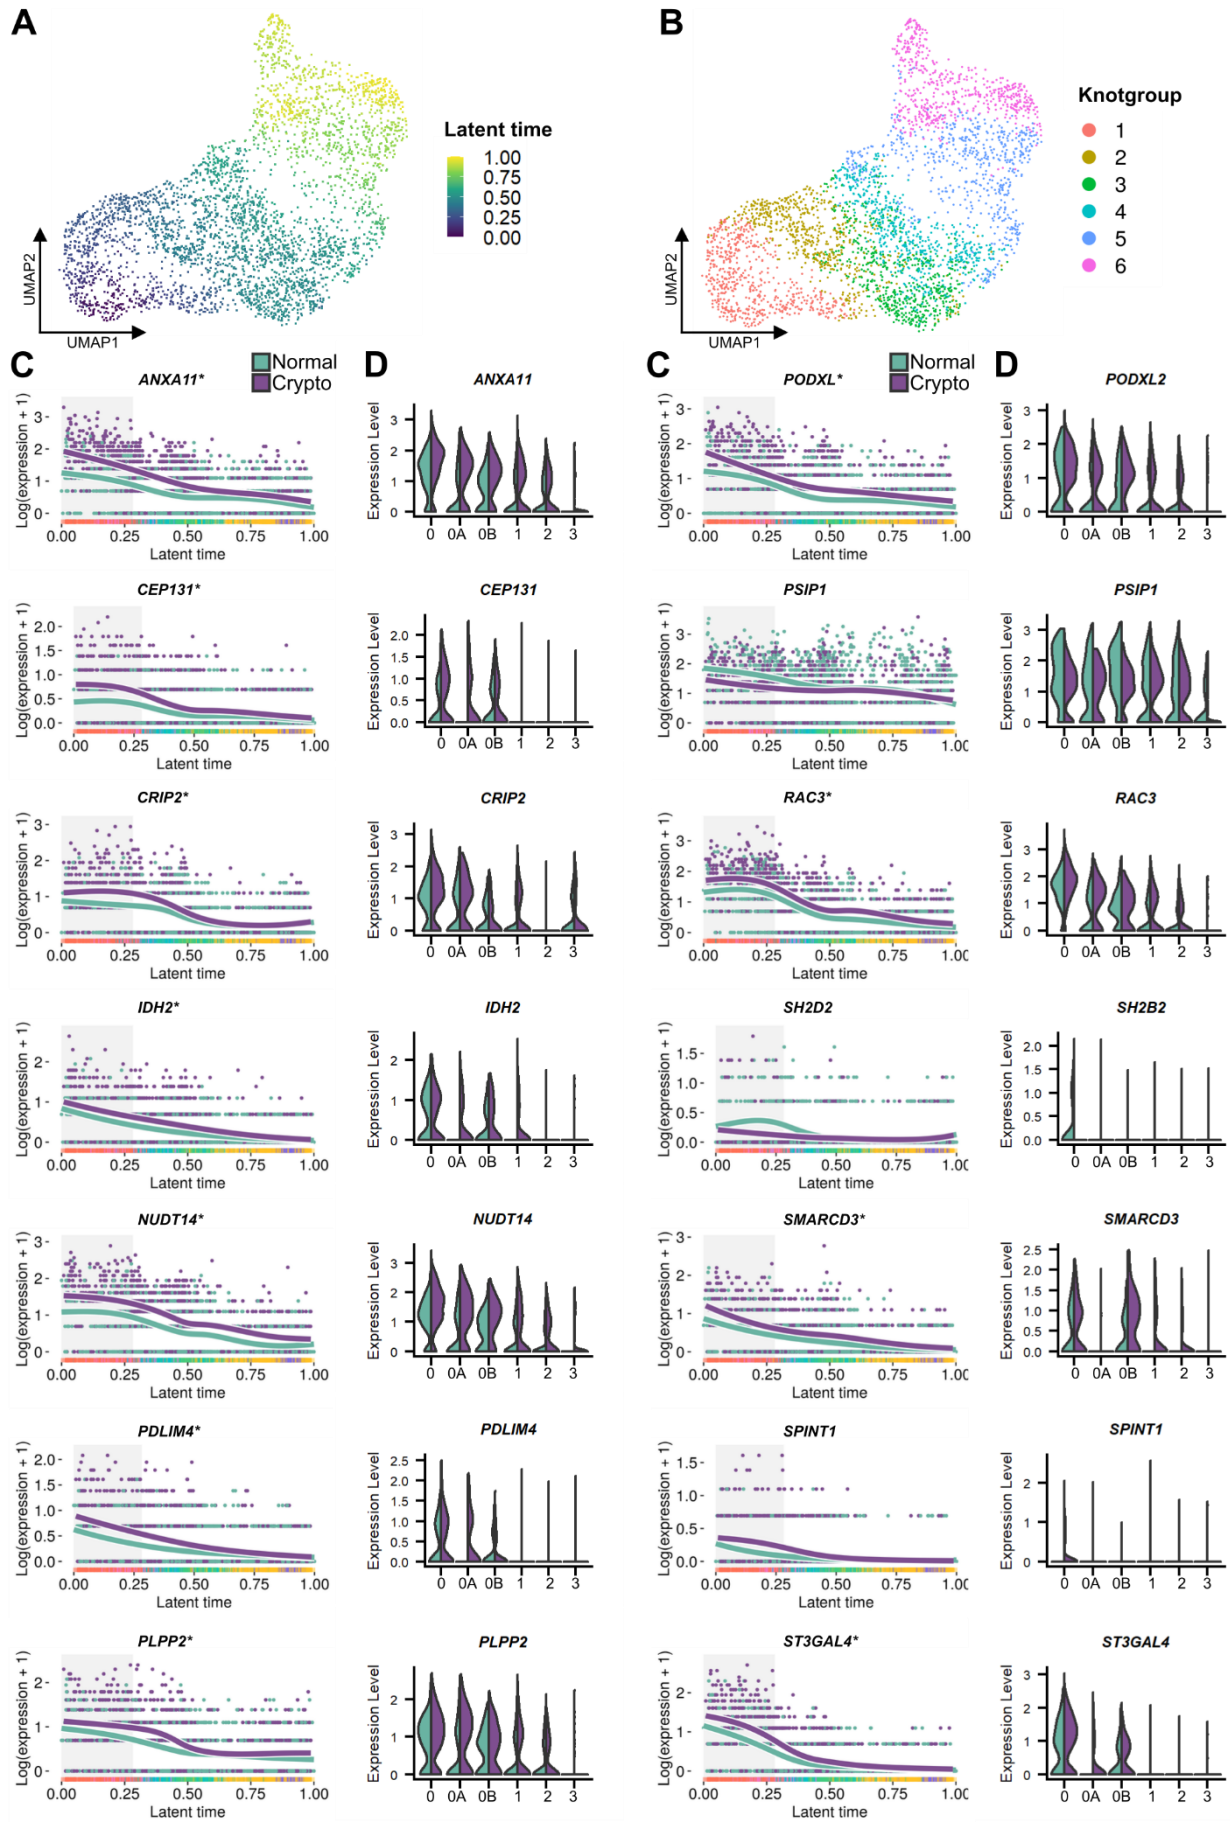

**Figure S6: EGR4-regulated genes in the knotgroup 1 spermatogonia.** (Related to Figure 7)

(A) UMAP plot showing the integrated normal-crypto spermatogonial dataset aligned along the latent time. The cells are color-coded according to their progression along the latent time. State 0 was set as starting point of the differentiation process.

(B) UMAP plot showing the subdivision of the integrated normal-crypto spermatogonial dataset into six knotgroups. The cells are color coded according to their respective knotgroup.

(C) Line plots show the expression along the latent time of the EGR4-regulated differentially expressed genes in normal (teal) and crypto (purple) spermatogonia included in the knotgroup 1: *ANXA11*, *CEP131*, *CRIP2*, *IDH2*, *NUDT14*, *PDLIM4*, *PLPP2*, *PODXL2*, *PSIP1*, *RAC3*, *SH2B2*, *SMARCD3*, *SPINT1*, and *ST3GAL4*. The gray area highlights the cells belonging to the knotgroup 1. The asterisk indicates EGR4-regulated genes that were also differentially expressed in knotgroup 2.

(D) Double violin plots comparing the expression levels of EGR4-regulated *ANXA11*, *CEP131*, *CRIP2*, *IDH2*, *NUDT14*, *PDLIM4*, *PLPP2*, *PODXL2*, *PSIP1*, *RAC3*, *SH2B2*, *SMARCD3*, *SPINT1*, and *ST3GAL4* in the spermatogonial states of the normal (teal) and crypto (purple) datasets.



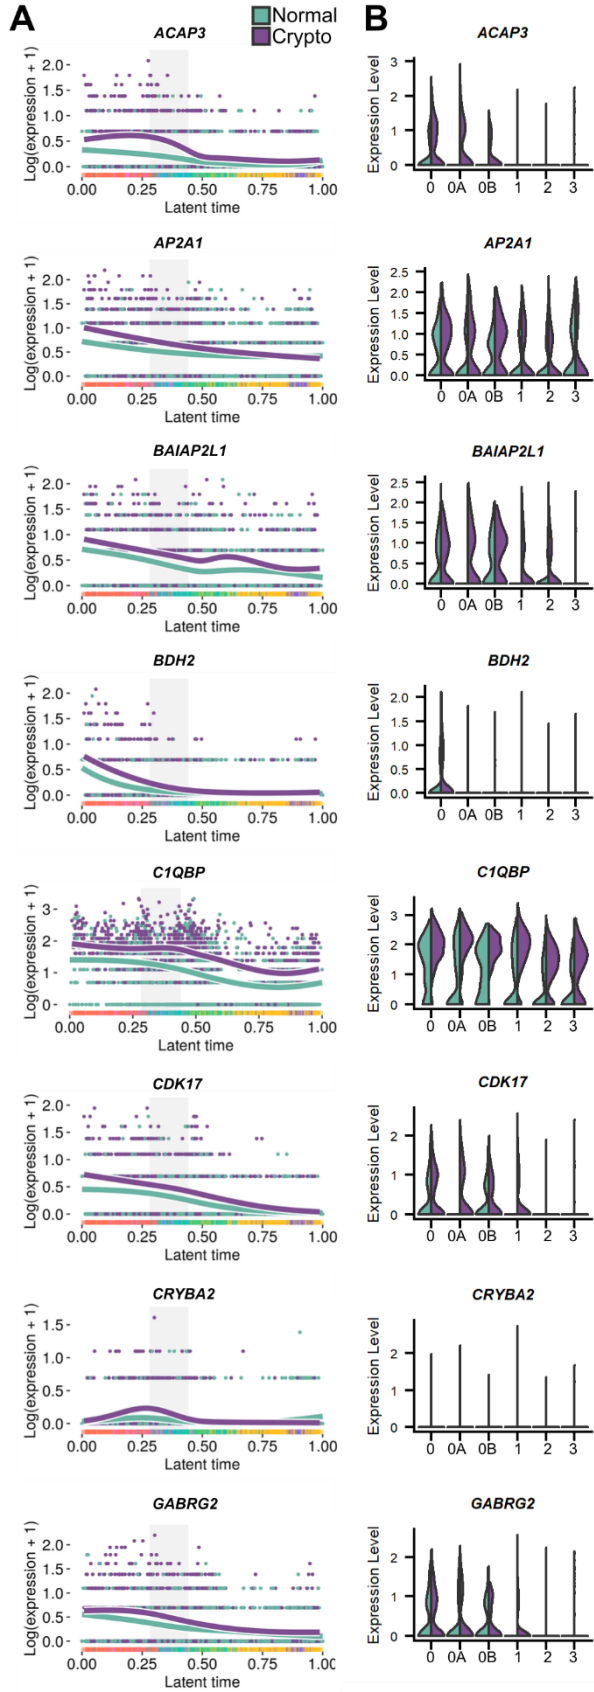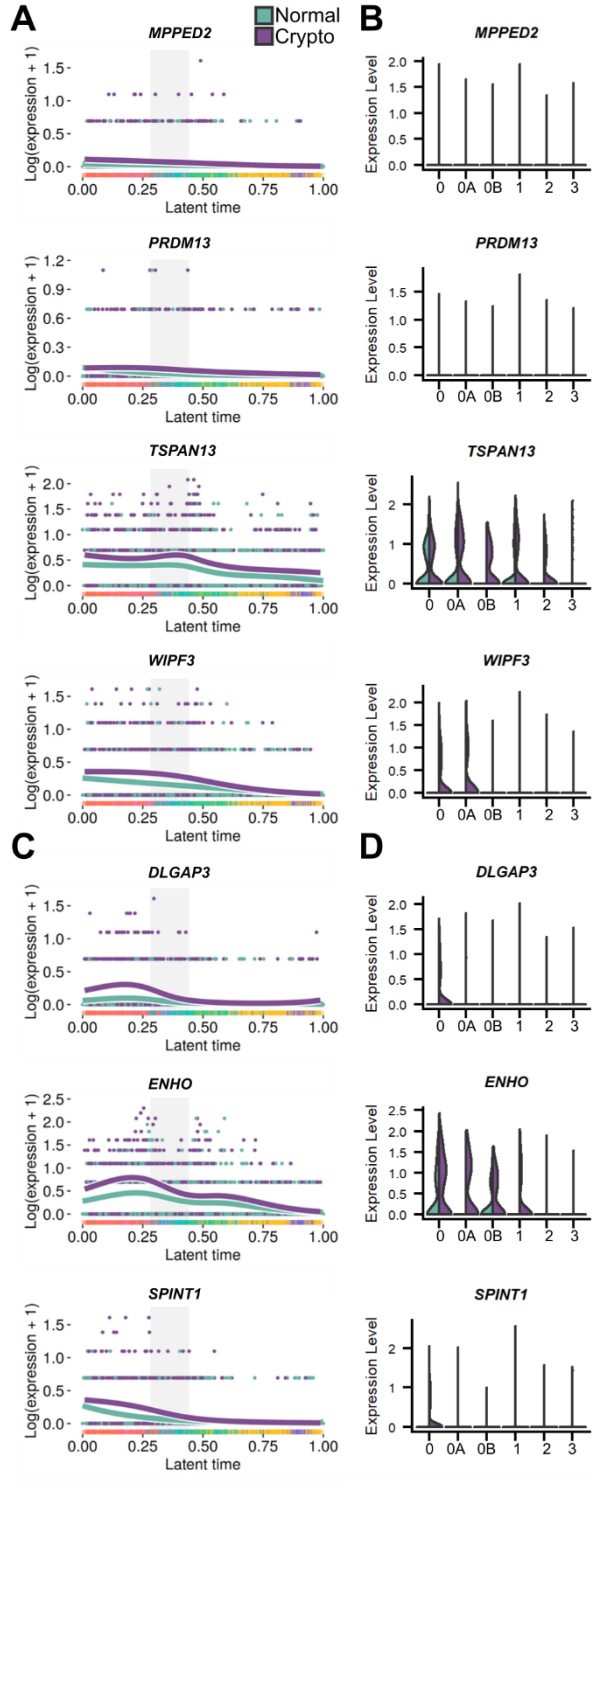

**Figure S7: EGR4- and HOXC9-regulated genes in knotgroup 2 spermatogonia.** (Related to Figure 7)

(A) Line plots showing the expression along the latent time of EGR4-regulated, differentially expressed genes between the normal (teal) and crypto (purple) spermatogonia in the knotgroup 2: *ACAP3*, *AP2A1*, *BAIAP2L1*, *BDH2*, *CIQBP*, *CDK17*, *CRYBA2*, *GABRG2*, *MPPED2*, *PRDM13*, *TSPAN13*, and *WIPF3*. The gray area highlights the cells belonging to the knotgroup 2.

(B) Double violin plots comparing the expression levels of EGR4-regulated genes *ACAP3*, *AP2A1*, *BAIAP2L1*, *BDH2*, *CIQBP*, *CDK17*, *CRYBA2*, *GABRG2*, *MPPED2*, *PRDM13*, *TSPAN13*, and *WIPF3* between the normal (teal) and crypto (purple) spermatogonial states.

(C) Line plots showing the expression along the latent time of the EGR4- and HOXC9-regulated, differentially expressed genes between the normal (teal) and crypto (purple) spermatogonia in knotgroup 2: *DLGAP3*, *ENHO*, and *SPINT1*. The gray area highlights the knotgroup 2.

(D) double violin plots comparing the expression levels of EGR4- and HOXC9-regulated genes *DLGAP3*, *ENHO*, and *SPINT1* between the normal (teal) and crypto (purple) spermatogonial states.



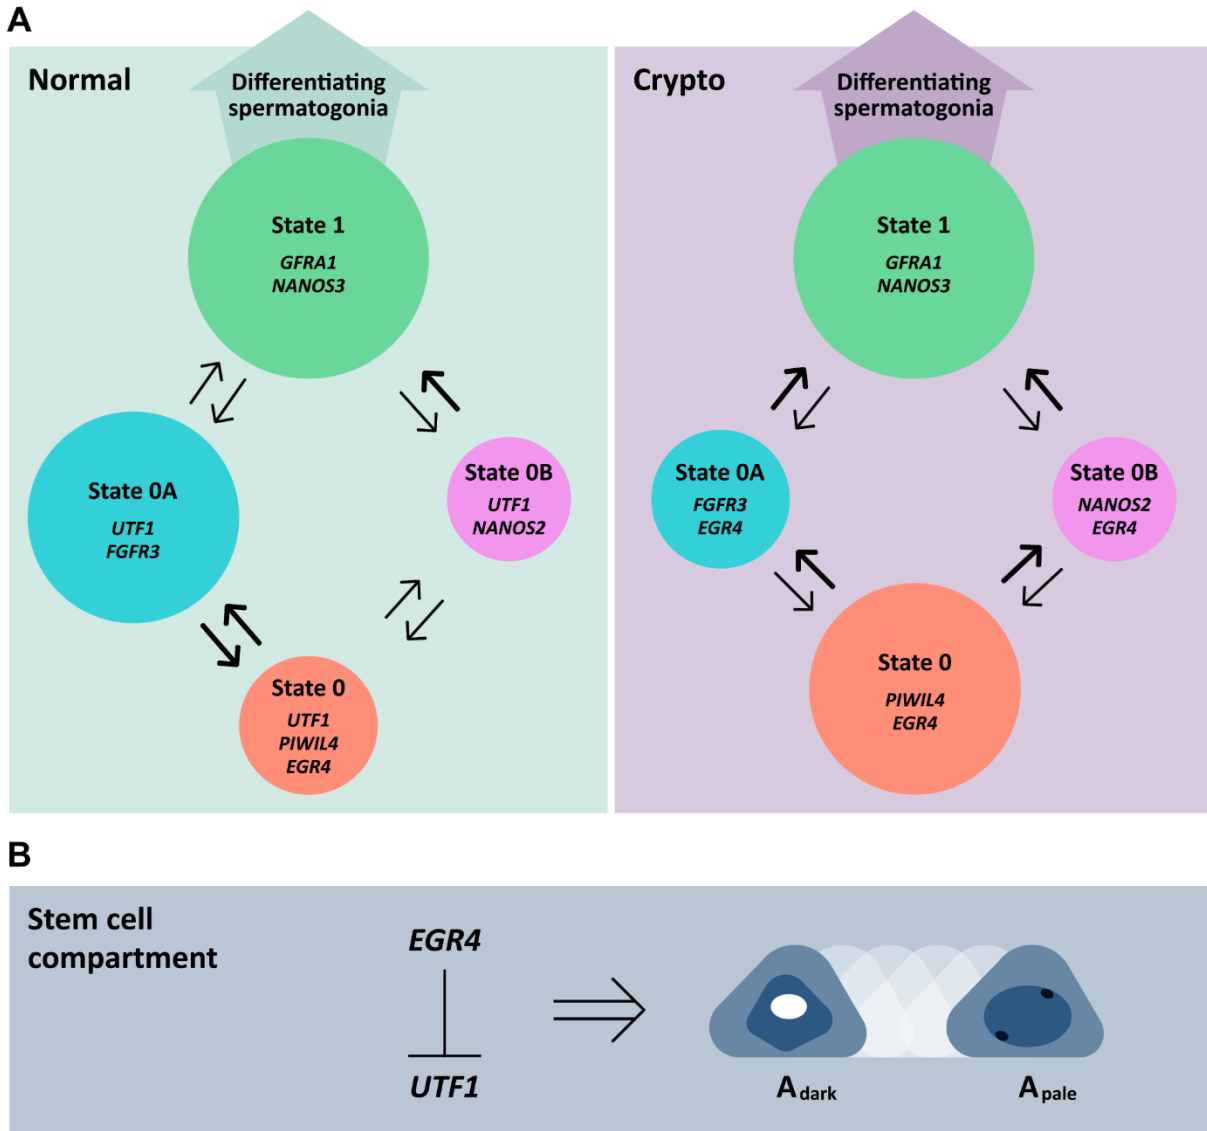

**Figure S8: Model of the human spermatogonial compartment in normal and crypto samples.** (Related to Discussion)

(A) The circles represent the State 0 (red), State 0A (blue), State 0B (magenta) and State 1 (green) spermatogonia. The thickness of the black arrows indicates the proportion of cells changing their expression profile. We showed that the  $A_{dark}$  spermatogonia are within all the different spermatogonial subpopulations with a low proportion within the  $PIWIL4^+$  cells (State 0).

(B) Suggested mechanism: the EGR4 mediated UTF1 downregulation induces the chromatin remodeling resulting in the transition from  $A_{dark}$  to  $A_{pale}$  morphology.
